# Supplementary material for: Protaetia brevitarsis seulensis Derived Protein Isolate with Enhanced Osteomodulatory and Antioxidative Property
Source: MDPI journal article supplement (doi:10.3390/molecules25246056), 2020-12-21
Supplement: s1 [file s1]

# ***Protaetia brevitarsis seulensis* Derived Protein Isolate with Enhanced Osteomodulatory and Antioxidative Property**

Keya Ganguly<sup>1</sup>, Min-Soo Jeong<sup>2</sup>, Sayan Deb Dutta<sup>1</sup>, Dinesh K. Patel<sup>1</sup>, Seong-Jun Cho<sup>2\*</sup>,  
and Ki-Taek Lim<sup>1\*</sup>

<sup>1</sup>Department of Biosystems Engineering, College of Agriculture and Life Sciences, Kangwon National University, Chuncheon-24341, Republic of Korea.

<sup>2</sup>Department of Food Science and Biotechnology, College of Agriculture and Life Sciences, Kangwon National University, Chuncheon-24341, Republic of Korea.

## Supplementary Figures

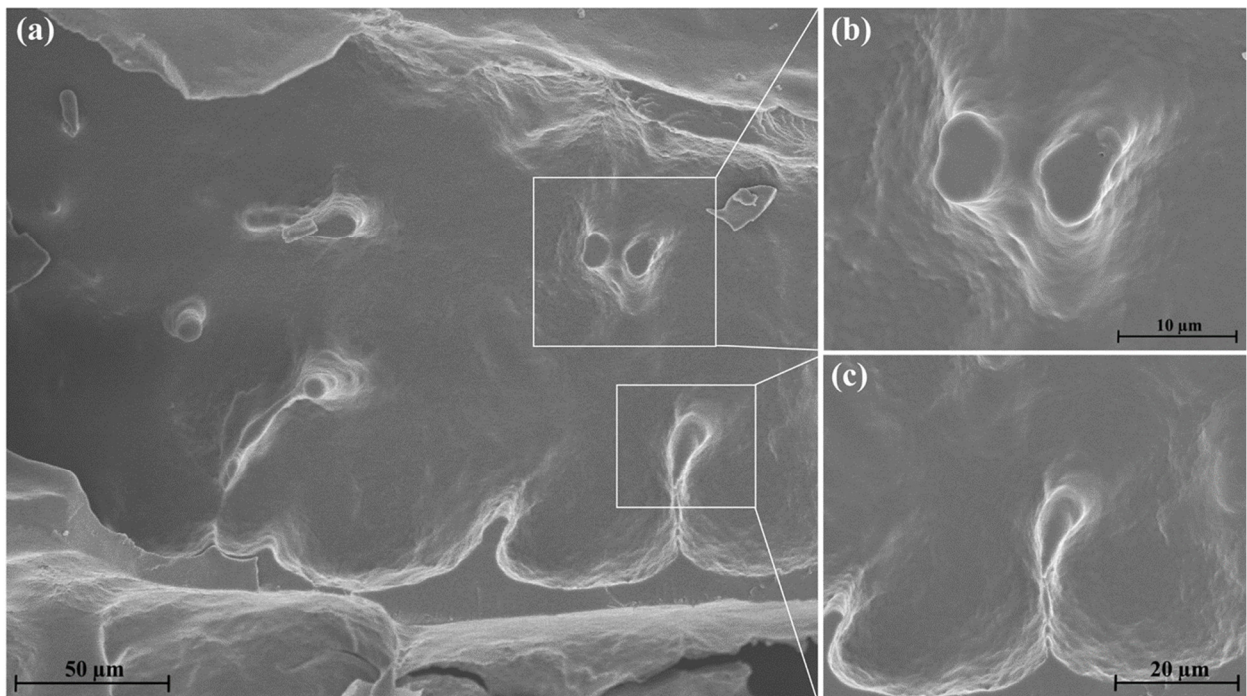

**Figure S1.** Representative FE-SEM morphologies of *P. brevitarsis* protein isolate (PPI).

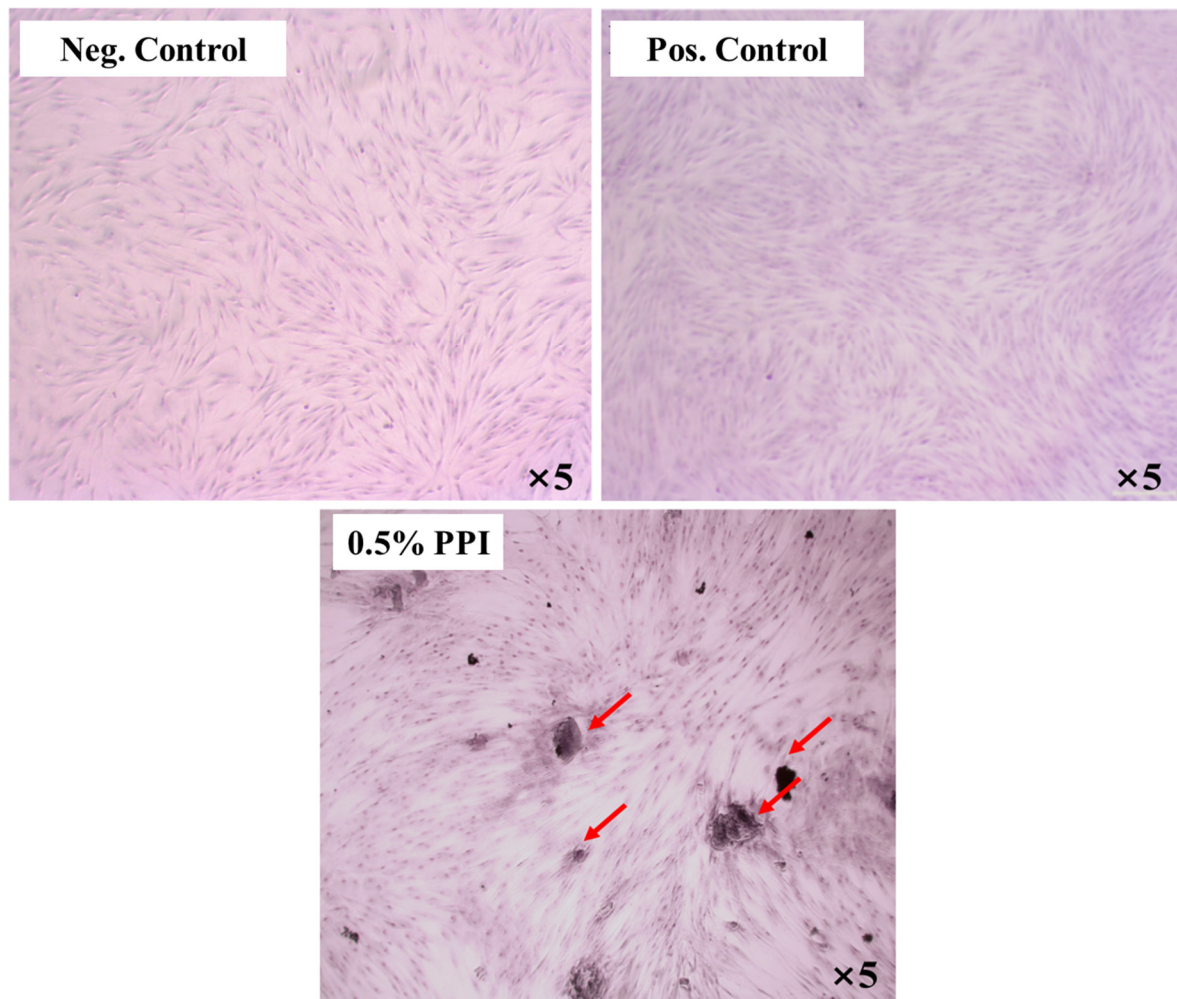

**Figure S2.** Giemsa staining of PPI-treated hBMSCs after 3 days of incubation. The red arrows indicate the *P. brevitarsis* protein isolates (PPI).

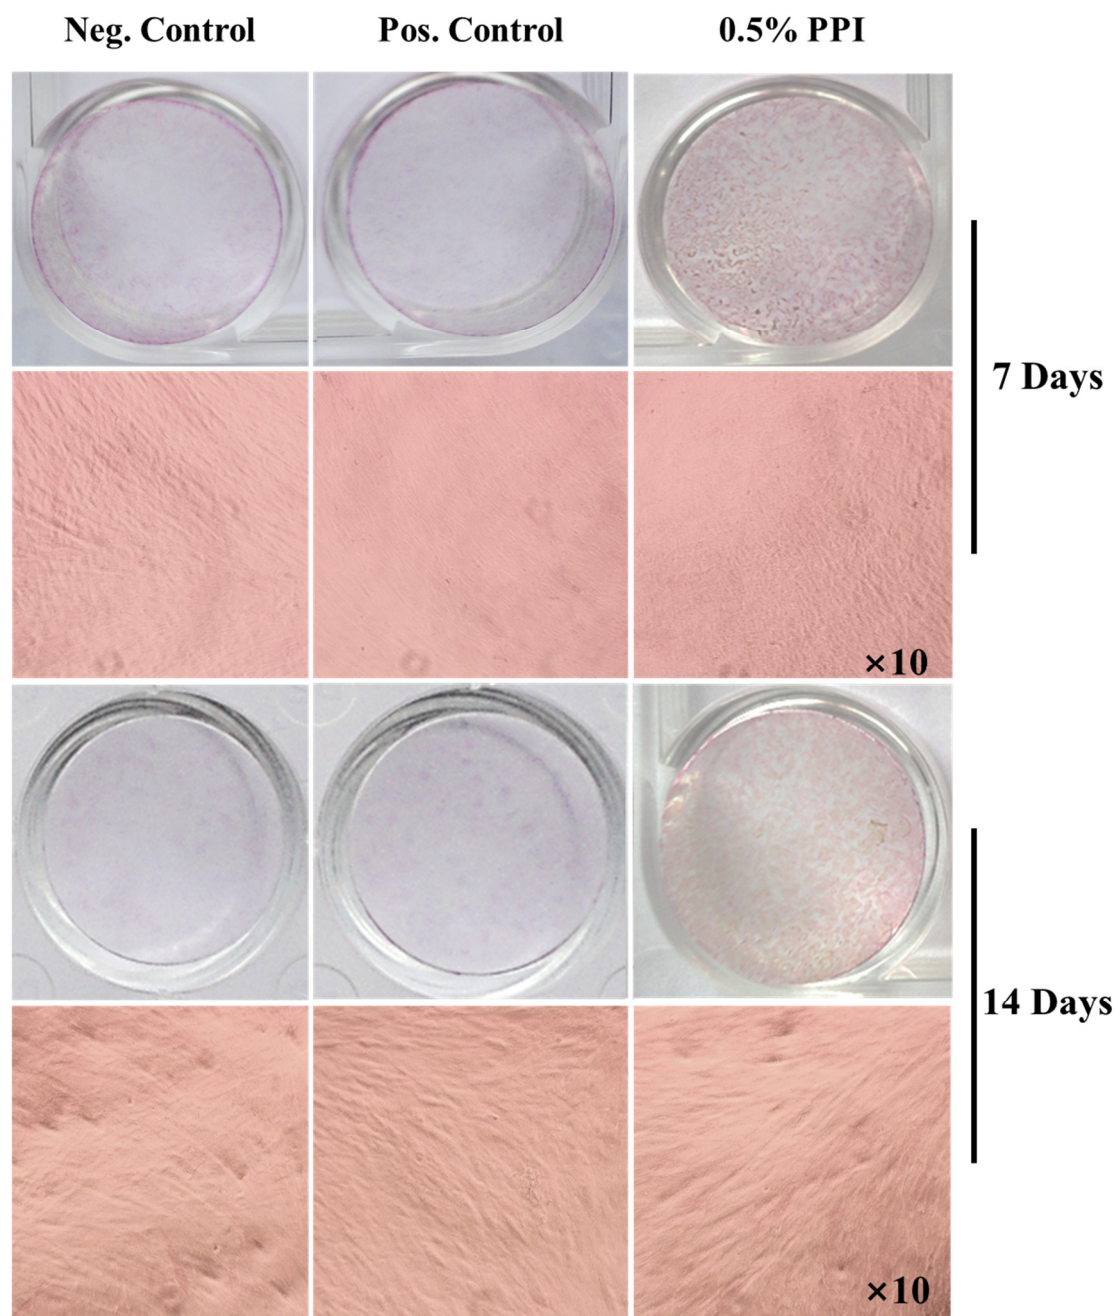

**Figure S3.** ALP activity of hBMSCs after 7 and 14 days of incubation with *P. brevitaris* protein isolates (PPI).

**Table S1.** List of antibodies used for immunofluorescence staining.

| Antibody | Dilution | Dye    | Company                       |
|----------|----------|--------|-------------------------------|
| Runx2    | 1:250    | AF-488 | Santa Cruz Biotechnology, USA |
| ALP      | 1:250    | AF-488 | Santa Cruz Biotechnology, USA |
| OPN      | 1:250    | AF-594 | Santa Cruz Biotechnology, USA |
